# Supplementary material
Source: publisher figshare collection journal article supplement (https://asha.figshare.com/articles/dataset/_/7905377)
Supplement: Supplementary file 1 [file 1]

**Supplemental Material S5.** A woman's personal narrative in its entirety (example of a narrative produced by a woman with 12 years of education).

<sup>10</sup>*I'm from Highpoint, North Carolina.* <sup>20</sup>*My father had a tobacco farm there.* <sup>30</sup>*And (he) was working very hard to pay for his land.* <sup>4C</sup>*His uncle came down to visit.* <sup>5C</sup>*And (his uncle) told him that, "George, you are killing yourself.* <sup>6C</sup>*If I find you a job in Washington, will you come?"* <sup>7E</sup>*So my father decided that was a good thing to happen.* <sup>8C</sup>*And he got him a job at PEPCO.* <sup>9C</sup>*Eventually, me and my mother, my sister and my brothers decided to move to Washington, too.* <sup>10C2</sup>*My sister and I, we would catch the bus down the hill to Nannie Burroughs School, Nannie Burroughs Avenue.* <sup>11C2</sup>*And then we would catch the streetcar to go in town to school.* <sup>120</sup>*My mother was a housewife.* <sup>13E</sup>*And everyone cared for each other.* <sup>14E</sup>*You don't see whole families like that was back then anymore.* <sup>15E</sup>*And I had a happy upbringing.* <sup>16CO</sup>*So only thing I can say.* <sup>17CO</sup>*I had a good life.*
