# Supplementary material
Source: publisher figshare collection journal article supplement (https://asha.figshare.com/articles/dataset/_/7905377)
Supplement: Supplementary file 2 [file 1]

**Supplemental Material S2.** A male's personal narrative in its entirety.

<sup>10</sup>*It was my mother and my brother.* <sup>20</sup>*And it was around Christmas time.* <sup>30</sup>*We didn't have a lot.* <sup>4C</sup>*And I remember telling my brother, I said "What do you want for Christmas?"* <sup>5C</sup>*He said he wanted a wagon.* <sup>6C</sup>*All I wanted was a pair of pajamas.* <sup>7C</sup>*And we slept together.* <sup>8E</sup>*We knew that we probably wouldn't get the wagon or the pajamas.* <sup>9C</sup>*So while we were sleeping in bed, my mother came in the room.* <sup>10C</sup>*And (she) got us up.* <sup>11C</sup>*And (she) said, "Merry Christmas."* <sup>12C</sup>*We woke up early that Christmas morning.* <sup>13C</sup>*And we went through the hallway.* <sup>14R</sup>*And there was the wagon.* <sup>15R</sup>*And she handed me a pair of pajamas.* <sup>16R</sup>*And I sort of looked at her.* <sup>17R</sup>*She started smiling.* <sup>18CO</sup>*And as I go back I think that was probably the happiest time of my life.*
