# Supplementary material
Source: publisher figshare collection journal article supplement (https://asha.figshare.com/articles/dataset/_/7905377)
Supplement: Supplementary file 3 [file 1]

**Supplemental Material S6.** A male's O'Henry story retelling in its entirety (example of a narrative produced by a male with a baccalaureate degree).

<sup>10</sup>A guy was waiting at a restaurant that was vacant. <sup>20</sup>He had a cigar. <sup>3C</sup>A policeman came down the street. <sup>4C</sup>And (he) was curious as to why the man was there. <sup>5C</sup>The man said "I'm waiting on a friend." <sup>6C</sup>He lit his cigar. <sup>7C</sup>And (he) talked about how he was going to meet a friend. <sup>8C</sup>They ate at a restaurant. <sup>9C</sup>And (they) talked about how they were going to meet 20 years at the same day and time. <sup>10C</sup>The time that they would meet was 10 o'clock. <sup>11C</sup>After the policeman left, a man came over with his collar up over his ears. <sup>12C</sup>One guy was Bob and the other Jimmy Wells. <sup>13C</sup>They greeted one another. <sup>14C</sup>Then when they were about to walk off to go to another place to talk, they stopped. <sup>15E</sup>Something odd was about to happen because he said something about his nose. <sup>16R</sup>He was not the guy that he thought he was. <sup>17R</sup>The guy said when he lit his cigar he noticed that he was the guy that was wanted in Chicago. <sup>18R</sup>There was going to be a plain clothes man that was going to arrest him. <sup>19CO</sup>That was it.
