# Supplementary material
Source: publisher figshare collection journal article supplement (https://asha.figshare.com/articles/dataset/_/7905377)
Supplement: Supplementary file 4 [file 1]

**Supplemental Material S3.** A woman's personal narrative in its entirety (example of a short narrative).

<sup>10</sup>*This happened in Murfreesboro, Tennessee at a school, Bradley Academy.* <sup>20</sup>*We would have recesses.* <sup>30</sup>*And kids would play.* <sup>40</sup>*And when we played they would have rings that we played in.* <sup>5E</sup>*And every recess we looked forward to coming out of the school playing in these little rings.* <sup>6C</sup>*And there was three friends.* <sup>7C</sup>*And we would always try to jump in the rings before anybody else.* <sup>8C</sup>*So they would form a circle around us.* <sup>9C</sup>*And we would play things like, "Little Sally Walker" or "Old Cows Dead." and little things that were really African oriented because we knew some of the teachers were older.* <sup>10C</sup>*And our parents were older.* <sup>11E</sup>*And we enjoyed hearing them tell stories of slavery and how the kids used to play then.* <sup>12C</sup>*So we kind of copy that.* <sup>13C</sup>*And (we would) start playing.* <sup>14C</sup>*Someone would call.* <sup>15C</sup>*And (we) answering.* <sup>16C</sup>*One of the girls would call the story out.* <sup>17C</sup>*"Have you seen my cow"?* <sup>18C</sup>*And we said, "The old cows dead."* <sup>19C</sup>*And then we do a little dance.* <sup>20C</sup>*We'd just shake ourselves, our hips and things.* <sup>21R</sup>*So that was the first introduction since we didn't have books on African history taken from the people that we actually knew that hearing them talk about the stories of slavery.* <sup>23CO</sup>*So that was what we enjoyed a whole lot.*
