# Supplementary material
Source: publisher figshare collection journal article supplement (https://asha.figshare.com/articles/dataset/_/7905377)
Supplement: Supplementary file 5 [file 1]

**Supplemental Material S4.** A male's personal narrative in its entirety (example of tangential/topic neutral narrative produced by a male with 12 years education).

<sup>10</sup>*Last night I came home.* <sup>2C</sup>*[I] Lost my glasses because my ex-wife got on my nerves.*  
<sup>3C</sup>*This morning Ms. Jones came to pick me up.* <sup>4C</sup>*I told her I couldn't catch a ride  
because of Metro Access.* <sup>5C</sup>*Ms. White, when I came down on the elevator, told me that I  
had to go back upstairs and get my electric wheelchair.* <sup>6C</sup>*I told her that she needs to  
mind her business.* <sup>7C</sup>*I came to the center here this morning and found some nice glasses  
at the flea market that they were having here this morning.* <sup>8R</sup>*Now I am waiting on my  
lunch.* <sup>9CO</sup>*To top the day off, maybe I'll find my phone.*
