# Supplementary material
Source: publisher figshare collection journal article supplement (https://asha.figshare.com/articles/dataset/_/7905377)
Supplement: Supplementary file 6 [file 1]

**Supplemental Material S1.** A woman's personal narrative in its entirety (example of an emotionally laden narrative).

<sup>10</sup>*I was raised in the area where people were pretty poor.* <sup>20</sup>*My mother was with a man who was not my father.* <sup>30</sup>*He was very abusive to my sister.* <sup>4E</sup>*I won't get into all that.* <sup>5E/C</sup>*But it made an impact on my life because I told my mother what he was doing.* <sup>6C</sup>*He was molesting my sister.* <sup>7C</sup>*When I told her, my mother slapped me down.* <sup>8C</sup>*He told my mother to get rid of the little bastard.* <sup>9E</sup>*That's the only curse word I'ma use, which was true.* <sup>10E</sup>*I mean, we weren't bastards.* <sup>11E</sup>*But it's just that what he said.* <sup>12C</sup>*And my mother reacted on it.* <sup>13C</sup>*And she got rid of us.* <sup>14C</sup>*The reason why we had to leave was because it was a fire in the house.* <sup>15C</sup>*And his only son was burnt up.* <sup>16C</sup>*We were not playing with matches.* <sup>17O</sup>*During those days some families lived in one room.* <sup>18O</sup>*They couldn't afford but one room.* <sup>19O</sup>*In those days, people had a lot of rooming houses because that's the way a lot of black folks lived in that time.* <sup>20C</sup>*And the oil stove was there.* <sup>21C</sup>*We were jumping on the bed.* <sup>22O</sup>*I was four.* <sup>23O</sup>*My brother was three.* <sup>24O</sup>*My oldest sister couldn't have been no more than about six years old.* <sup>25C</sup>*She left us in the house to go to the playground with my other brother.* <sup>26C</sup>*And we were jumping on the bed.* <sup>27C</sup>*And the oil stove turned over.* <sup>28C</sup>*It was between the two beds.* <sup>29C</sup>*And the baby was burnt up.* <sup>30C</sup>*So that's why he didn't want us around.* <sup>31E</sup>*That affected my life a whole lot.* <sup>32E</sup>*I think it was the separation from knowing that you had brothers and sisters.* <sup>33R</sup>*But I was with people who loved me.* <sup>34R</sup>*Who took care of me.* <sup>35R</sup>*Who didn't have any children.* <sup>36R/E</sup>*And through my grandmother and through her faith as a Christian (she) helped me a whole lot.* <sup>37R</sup>*And (she) taught me a whole lot even as a child.* <sup>38R</sup>*She died, I think, when I was about four or five.* <sup>39R</sup>*But it was her love for me that got me through a lot of things.* <sup>40E</sup>*And I don't want anybody to go through what I went through.* <sup>41E</sup>*Life can be difficult.* <sup>42E</sup>*So complicated.* <sup>43CO</sup>*But I do know that you can change your life if you want to.* <sup>44CO</sup>*You have to really want to.*
