# Supplementary material
Source: publisher figshare collection journal article supplement (https://asha.figshare.com/articles/dataset/_/7905377)
Supplement: Supplementary file 7 [file 1]

**Supplemental Material S7.** A woman's O'Henry's story in its entirety (example of a narrative produced by a woman with a baccalaureate degree).

<sup>10</sup>*This is a story that spoke of a gentleman who went to meet his friend after 20 years.* <sup>20</sup>*And he stood in the doorway that was once a restaurant, called Big Joe's.* <sup>3C</sup>*And the policeman came by.* <sup>4C</sup>*And (he) asked him why he was standing there.* <sup>5C</sup>*He indicated that he had planned to meet a good friend who he hadn't seen for 20 years because they both parted ways.* <sup>6O</sup>*One went to the west to make his fortune.* <sup>7O</sup>*And the other one stayed in New York (ok?).* <sup>8C</sup>*And at that time (at that time) he was talking to the policeman.* <sup>9C</sup>*The policeman asked him how long he thought he would wait on his friend.* <sup>10C</sup>*He said approximately another 20 or 30 minutes.* <sup>11C</sup>*So, ironically, a gentleman came across the street wearing a trenchcoat and with the collar pulled up around his ears.* <sup>12C</sup>*And they said they would go to another store to sit and and talk about good times, the old days.* <sup>13C</sup>*So at that time they both took an opportunity to look at each other.* <sup>14R</sup>*And the man in the doorway realized that it wasn't his friend after all.* <sup>15R</sup>*And (he) come to find out his friend was a policeman himself.* <sup>16R</sup>*And he realized this when he lit his cigar while he was standing in the doorway.* <sup>17R</sup>*It was a picture of a wanted man.* <sup>18R</sup>*And he could not arrest his friend himself.* <sup>19R</sup>*So therefore, he sent a plainclothes policeman to do it.* <sup>20O</sup>*Now, the individual's names were Jimmy and Bob.* <sup>21E</sup>*I'm sorry I can't remember the other man's name.* <sup>22O</sup>*I think it's Bob.* <sup>23CO</sup>*And that's the end of the story.* <sup>24E</sup>*The moral of the story is that even if you make your fortune illegally, you never take the chance of not paying for your crimes.* <sup>25E</sup>*You will pay one way or the other.* <sup>26E</sup>*Just so happened that he had to go all the way back to New York to pay.* <sup>27CO</sup>*And his friend ended up being a policeman.* <sup>28CO</sup>*That's it.*
